# Supplementary material for: Quality of life of inguinal hernia patients in Taiwan: The application of the hernia-specific quality of life assessment instrument
Source: PubMed Central journal article supplement (PMC5560705; doi:10.1371/journal.pone.0183138), 2017-08-17

# HERQL (Version 1.1)

\* Required

## Discomfort induced by hernia in the past week

---

1. Please indicate the severity of pain induced by hernia at rest (i.e. lie down) \*

Mark only one oval.

|                    |                       |                       |                       |                       |                       |                       |                       |                       |                       |                       |                       |                             |
|--------------------|-----------------------|-----------------------|-----------------------|-----------------------|-----------------------|-----------------------|-----------------------|-----------------------|-----------------------|-----------------------|-----------------------|-----------------------------|
|                    | 0                     | 1                     | 2                     | 3                     | 4                     | 5                     | 6                     | 7                     | 8                     | 9                     | 10                    |                             |
| Not at all painful | <input type="radio"/> | <input type="radio"/> | <input type="radio"/> | <input type="radio"/> | <input type="radio"/> | <input type="radio"/> | <input type="radio"/> | <input type="radio"/> | <input type="radio"/> | <input type="radio"/> | <input type="radio"/> | Most severe pain imaginable |

---

2. Is there any protrusion or straining sensation over your abdominal wall/groin hernia? \*

Mark only one oval.

- Never
- Seldom (once every several months)
- Occasionally (several times a month)
- Often (several times a week)
- Persistent

3. Please indicate the severity of pain induced by hernia during light activity (i.e. walking) \*

Mark only one oval.

|                    |                       |                       |                       |                       |                       |                       |                       |                       |                       |                       |                       |                             |
|--------------------|-----------------------|-----------------------|-----------------------|-----------------------|-----------------------|-----------------------|-----------------------|-----------------------|-----------------------|-----------------------|-----------------------|-----------------------------|
|                    | 0                     | 1                     | 2                     | 3                     | 4                     | 5                     | 6                     | 7                     | 8                     | 9                     | 10                    |                             |
| Not at all painful | <input type="radio"/> | <input type="radio"/> | <input type="radio"/> | <input type="radio"/> | <input type="radio"/> | <input type="radio"/> | <input type="radio"/> | <input type="radio"/> | <input type="radio"/> | <input type="radio"/> | <input type="radio"/> | Most severe pain imaginable |

---

4. Please indicate the severity of pain induced by hernia during moderate activity (i.e. climbing stairs) \*

Mark only one oval.

|                    |                       |                       |                       |                       |                       |                       |                       |                       |                       |                       |                       |                             |
|--------------------|-----------------------|-----------------------|-----------------------|-----------------------|-----------------------|-----------------------|-----------------------|-----------------------|-----------------------|-----------------------|-----------------------|-----------------------------|
|                    | 0                     | 1                     | 2                     | 3                     | 4                     | 5                     | 6                     | 7                     | 8                     | 9                     | 10                    |                             |
| Not at all painful | <input type="radio"/> | <input type="radio"/> | <input type="radio"/> | <input type="radio"/> | <input type="radio"/> | <input type="radio"/> | <input type="radio"/> | <input type="radio"/> | <input type="radio"/> | <input type="radio"/> | <input type="radio"/> | Most severe pain imaginable |

---



**10. Do you experience any discomfort in the past week? \***

(multiple selections)

*Check all that apply.*

- Not at all
- Upper gastrointestinal discomfort
- Lower gastrointestinal discomfort
- Back discomfort
- Urinary discomfort
- Sexual discomfort
- Other: .....

**11. Please describe the impact of hernia on your health \***

*Mark only one oval.*

- No impact at all
- Little impact
- Moderate impact
- Severe impact
- Extremely severe impact

**12. Does hernia elicit any economic burden for you? \***

*Mark only one oval.*

- No burden at all
- Little burden
- Moderate burden
- Severe burden
- Extremely severe burden

**13. Please value your global health/quality-of-life in the past week \***

*Mark only one oval.*

- Excellent
- Good
- Fair
- Poor
- Extremely poor

**14. Have you received surgical repair of hernia? \***

*Mark only one oval.*

- Not yet
- Repaired     *Skip to question 15.*

## **Having received hernia repair surgery**

**15. Have you ever experienced mesh foreign body sensation?**

(Skip this item if you did not receive mesh repair for hernia)

*Mark only one oval.*

- Never
- Seldom (once every several months)
- Occasionally (several times per month)
- Often (several times per week)
- Always

**16. Do you experience any discomfort associated with hernia surgery in the past week? \***

(multiple selections)

*Check all that apply.*

- Not at all
- Groin pain
- Groin or inner thigh paresthesia (numbness)
- Abdominal wall pain
- Abdominal wall paresthesia (numbness)
- Water contact or urination pain
- Coital pain
- Testicular pain
- Ovulation or menstration pain
- Other: \_\_\_\_\_

**17. Please indicate the severity of discomfort \***

*Mark only one oval.*

- No bother at all
- Little bothersome
- Moderate bothersome
- Very bothersome
- Extremely bothersome

**18. How do you rate your last hernia repair? \***

*Mark only one oval.*

- Very satisfactory
- Satisfactory
- Fair
- Unsatisfactory
- Very unsatisfactory

19. **Regarding outcome of hernia repair, you are.... \***

*Mark only one oval.*

- Very confident that hernia will not recur
- Supposedly that hernia will not recur
- Have no idea whether hernia will recur
- Worried about that hernia may recur
- The hernia has recurred

20. **How do you rate the improvement in quality-of-life by hernia repair? \***

*Mark only one oval.*

- A lot of improvement in quality-of-life
- Slight improvement in quality-of-life
- No change in quality-of-life
- Slight deterioration in quality-of-life
- Devastating in quality-of-life

---

Powered by

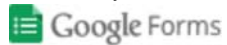

Supplement: pone.0183138.s007.pdf [file pone.0183138.s007.pdf]
